# Supplementary figures and images for: Arabidopsis GLAUCEpromotes fertilization-independent endosperm development and expression of paternally inherited alleles
Source: Oxford University Press journal article supplement (doi:10.1242/dev.007310), 2007-10-26

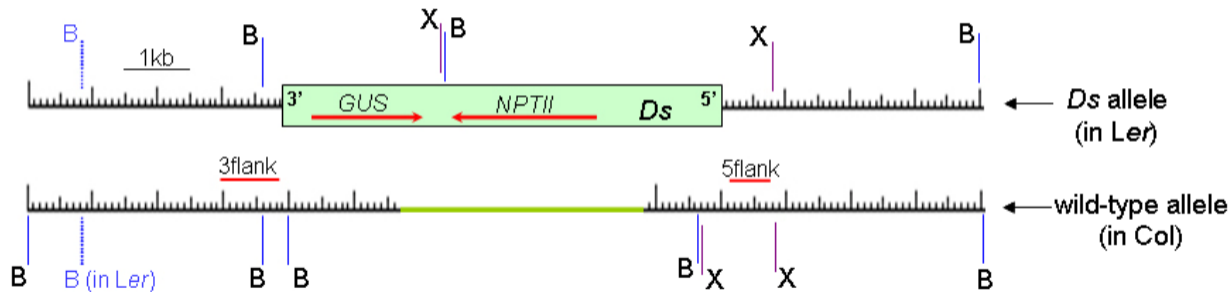

Supplement: dev007310-sup-007310-figs2.pdf [file dev007310-sup-007310-figs2.pdf]

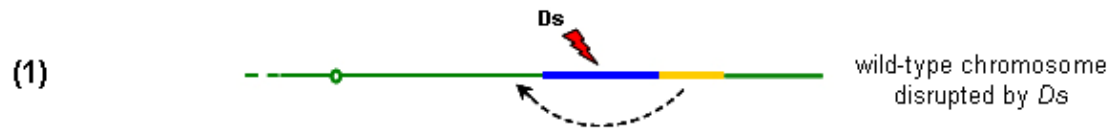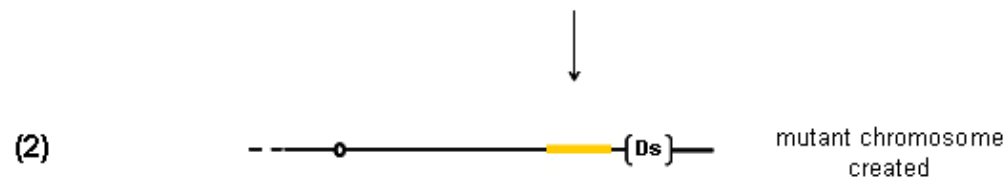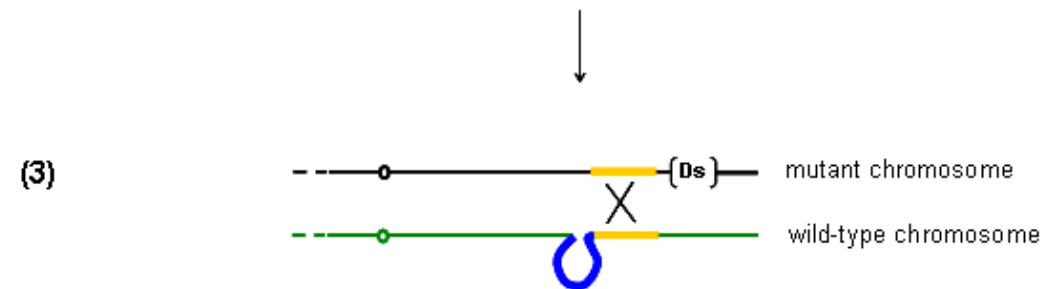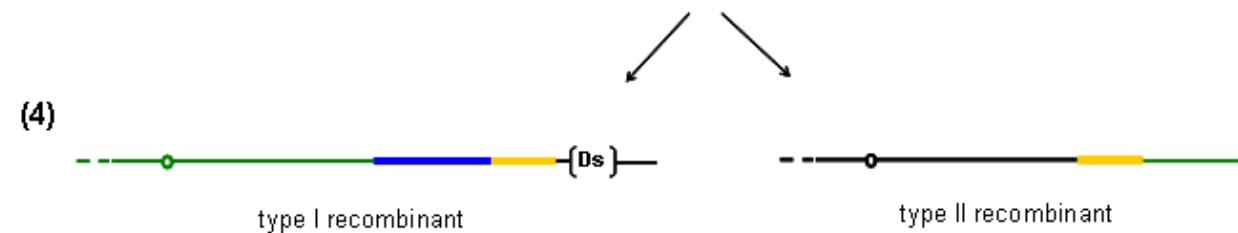

Supplement: dev007310-sup-007310-figs4.pdf [file dev007310-sup-007310-figs4.pdf]
